# Supplementary material
Source: publisher site journal article supplement (https://www.dovepress.com/article/364439)
Supplement: Supplementary file 1 [file get_supplementary_file.php]

**Supplementary Table 1** In vitro MIC (μg/ml) of the 24 *T.marneffei* strains from non-HIV-infected patients against 9 antifungals as determined by YeastOne method

| Antifungal agent | No. of isolates with MIC (μg/ml) | | | | | | | | | | | | MIC50 | MIC90 |
| --- | --- | --- | --- | --- | --- | --- | --- | --- | --- | --- | --- | --- | --- | --- |
| ≤0.008 | 0.015 | 0.03 | 0.06 | ≤0.12 | 0.25 | 0.5 | 1 | 2 | 4 | 8 | 16 |
| Amphotericin B |  |  |  |  | 9 | 12 | 2 | 1 |  |  |  |  | 0.25 | 0.5 |
| Itraconazole |  | (≤)a24 |  |  |  |  |  |  |  |  |  |  | ≤0.015 | ≤0.015 |
| Posaconazole | (≤)a 23 | 1 |  |  |  |  |  |  |  |  |  |  | ≤0.008 | ≤0.008 |
| Voriconazole | (≤)a18 | 6 |  |  |  |  |  |  |  |  |  |  | ≤0.008 | 0.015 |
| fluconazole |  |  |  |  |  | 1 | 3 | 8 | 8 | 3 | 1 |  | 2 | 4 |
| Anidulafungin |  | (≤)a 1 |  | 1 |  |  |  | 4 | 3 | 12 | (≥)b 3 |  | 4 | ≥8 |
| Micafungin | (≤)a 2 | 3 |  |  |  |  | 1 | 2 |  | 1 | (≥)b15 |  | ≥8 | ≥8 |
| Caspofungin | (≤)a 1 |  | 1 | 2 | 3 | 4 | 3 | 1 | 4 | 8 |  |  | 2 | 4 |
| 5-fluorocytosine |  |  |  | (≤)a5 | 4 | 9 | 5 | 1 |  |  |  |  | 0.25 | 0.5 |

a, no more than relative agent concentration; b, no less than relative agent concentration ; MIC, minimum inhibitory concentrations; MIC50, 50% minimun inhibitory concentration; MIC90, 90% minimun inhibitory concentration.

**Supplementary Table 2** In vitro MIC (μg/ml) of the 111 *T.marneffei* strains from HIV-infected patients against 9 antifungals as determined by YeastOne method

| Antifungal agent | No. of isolates with MIC (μg/ml) | | | | | | | | | | | | MIC50 | MIC90 |
| --- | --- | --- | --- | --- | --- | --- | --- | --- | --- | --- | --- | --- | --- | --- |
| ≤0.008 | 0.015 | 0.03 | 0.06 | ≤0.12 | 0.25 | 0.5 | 1 | 2 | 4 | 8 | 16 |
| Amphotericin B |  |  |  |  | 43 | 44 | 22 | 2 |  |  |  |  | 0.25 | 0.5 |
| Itraconazole |  | (≤)a107 | 4 |  |  |  |  |  |  |  |  |  | ≤0.015 | ≤0.015 |
| Posaconazole | (≤)a 91 | 18 | 2 |  |  |  |  |  |  |  |  |  | ≤0.008 | ≤0.008 |
| Voriconazole | (≤)a76 | 30 | 4 | 1 |  |  |  |  |  |  |  |  | ≤0.008 | 0.015 |
| fluconazole |  |  |  |  |  | 4 | 13 | 24 | 45 | 17 | 7 | 1 | 2 | 4 |
| Anidulafungin |  | (≤)a 3 | 2 |  |  |  | 3 | 2 | 23 | 53 | (≥)b 25 |  | 4 | ≥8 |
| Micafungin | (≤)a 3 | 8 | 3 | 5 | 3 |  | 1 | 5 | 1 | 2 | (≥)b80 |  | ≥8 | ≥8 |
| Caspofungin | (≤)a 2 | 2 | 3 | 4 | 7 | 11 | 3 | 16 | 20 | 36 | 7 |  | 2 | 4 |
| 5-fluorocytosine |  |  | 1 | (≤)a9 | 33 | 32 | 26 | 9 |  | 1 |  |  | 0.25 | 0.5 |

a, no more than relative agent concentration; b, no less than relative agent concentration ; MIC, minimum inhibitory concentrations; MIC50, 50% minimun inhibitory concentration; MIC90, 90% minimun inhibitory concentration.
